# Artificial Intelligence Enabled Prediction of Heart Failure Risk from Single-lead Electrocardiograms

## Short Title: AI-enabled HF Risk Prediction Using Single-lead ECG

Lovedeep S Dhingra MBBS<sup>1\*</sup>, Arya Aminorroaya MD, MPH<sup>1\*</sup>, Aline F Pedroso PhD<sup>1</sup>, Akshay Khunte BS<sup>2</sup>, Veer Sangha BS<sup>1,3</sup>, Daniel McIntyre MD, PhD<sup>4</sup>, Clara K Chow MBBS, PhD<sup>4,5</sup>, Folkert W Asselbergs MD, PhD<sup>6,7,8</sup>, Luisa CC Brant MD, PhD<sup>9,10</sup>, Sandhi M Barreto MD, PhD<sup>11</sup>, Antonio Luiz P Ribeiro MD, PhD<sup>9,10</sup>, Harlan M Krumholz MD, SM<sup>1,12,13</sup>, Evangelos K Oikonomou MD, DPhil<sup>1</sup>, Rohan Khera MD, MS<sup>1,12,14,15</sup>

<sup>1</sup>Section of Cardiovascular Medicine, Department of Internal Medicine, Yale School of Medicine, New Haven, CT, USA

<sup>2</sup>Department of Computer Science, Yale University, New Haven, CT, USA

<sup>3</sup>Department of Engineering Science, University of Oxford, Oxford, UK

<sup>4</sup>Westmead Applied Research Centre, Faculty of Medicine and Health, The University of Sydney, Westmead, Australia

<sup>5</sup>Department of Cardiology, Westmead Hospital, Sydney, Australia

<sup>6</sup>Department of Cardiology, Amsterdam Cardiovascular Sciences, Amsterdam University Medical Centre, University of Amsterdam, Amsterdam, Netherlands

<sup>7</sup>Institute of Health Informatics, University College London, London, UK

<sup>8</sup>The National Institute for Health Research University College London Hospitals Biomedical Research Centre, University College London, London, UK

<sup>9</sup>Department of Internal Medicine, Faculdade de Medicina, Universidade Federal de Minas Gerais, Belo Horizonte, Brazil

<sup>10</sup>Telehealth Center and Cardiology Service, Hospital das Clínicas, Universidade Federal de Minas Gerais, Belo Horizonte, Brazil

<sup>11</sup>Department of Preventive Medicine, School of Medicine, Faculdade de Medicina, Universidade Federal de Minas Gerais, Belo Horizonte, Brazil

<sup>12</sup>Center for Outcomes Research and Evaluation (CORE), Yale New Haven Hospital, New Haven, CT, USA

<sup>13</sup>Department of Health Policy and Management, Yale School of Public Health, New Haven, CT, USA

<sup>14</sup>Section of Biomedical Informatics and Data Science, Yale School of Medicine, New Haven, CT, USA

<sup>15</sup>Section of Health Informatics, Department of Biostatistics, Yale School of Public Health, New Haven, CT, USA

\* Contributed equally as co-first authors

### Correspondence to:

Rohan Khera, MD, MS

195 Church Street, 6<sup>th</sup> Floor, New Haven, CT 06510

(203) 764-5885; rohan.khera@yale.edu; @rohan\_khera

**Word Count:** 3399

**Keywords:** Heart failure, Deep learning, Wearable Devices, Electrocardiograms, Risk Stratification, Predictive Modelling

## KEY POINTS

**Question:** Can single-lead electrocardiograms (ECG) predict heart failure (HF) risk?

**Findings:** We evaluated a noise-adapted artificial intelligence (AI) algorithm for single-lead ECGs across multinational cohorts, spanning a diverse US health-system and community-based cohorts in the UK and Brazil. A positive AI-ECG screen was associated with 3- to 7-fold higher HF risk, independent of age, sex, and comorbidities. The AI model achieved incremental discrimination and improved reclassification over two established clinical risk scores for HF prediction.

**Meaning:** A noise-adapted AI model for single-lead ECG predicted the risk of new-onset HF, representing a scalable HF risk-stratification strategy for portable and wearable devices.

## ABSTRACT

**Importance:** Despite the availability of disease-modifying therapies, scalable strategies for heart failure (HF) risk stratification remain elusive. Portable devices capable of recording single-lead electrocardiograms (ECGs) can enable large-scale community-based risk assessment.

**Objective:** To evaluate an artificial intelligence (AI) algorithm to predict HF risk from noisy single-lead ECGs.

**Design:** Multicohort study.

**Setting:** Retrospective cohort of individuals with outpatient ECGs in the integrated Yale New Haven Health System (YNHHS) and prospective population-based cohorts of UK Biobank (UKB) and Brazilian Longitudinal Study of Adult Health (ELSA-Brasil).

**Participants:** Individuals without HF at baseline.

**Exposures:** AI-ECG-defined risk of left ventricular systolic dysfunction (LVSD).

**Main Outcomes and Measures:** Among individuals with ECGs, we isolated lead I ECGs and deployed a noise-adapted AI-ECG model trained to identify LVSD. We evaluated the association of the model probability with new-onset HF, defined as the first HF hospitalization. We compared the discrimination of AI-ECG against two risk scores for new-onset HF (PCP-HF and PREVENT equations) using Harrel's C-statistic, integrated discrimination improvement (IDI), and net reclassification improvement (NRI).

**Results:** There were 192,667 YNHHS patients (age 56 years [IQR, 41-69], 112,082 women [58%]), 42,141 UKB participants (65 years [59-71], 21,795 women [52%]), and 13,454 ELSA-Brasil participants (56 years [41-69], 7,348 women [55%]) with baseline ECGs. A total of 3,697 developed HF in YNHHS over 4.6 years (2.8-6.6), 46 in UKB over 3.1 years (2.1-4.5), and 31 in ELSA-Brasil over 4.2 years (3.7-4.5). A

positive AI-ECG screen was associated with a 3- to 7-fold higher risk for HF, and each 0.1 increment in the model probability portended a 27-65% higher hazard across cohorts, independent of age, sex, comorbidities, and competing risk of death. AI-ECG's discrimination for new-onset HF was 0.725 in YNHHS, 0.792 in UKB, and 0.833 in ELSA-Brasil. Across cohorts, incorporating AI-ECG predictions in addition to PCP-HF and PREVENT equations resulted in improved Harrel's C-statistic ( $\Delta_{PCP-HF}=0.112-0.114$ ;  $\Delta_{PREVENT}=0.080-0.101$ ). AI-ECG had IDI of 0.094-0.238 and 0.090-0.192, and NRI of 15.8%-48.8% and 12.8%-36.3%, vs. PCP-HF and PREVENT, respectively.

**Conclusions and Relevance:** Across multinational cohorts, a noise-adapted AI model defined HF risk using lead I ECGs, suggesting a potential portable and wearable device-based HF risk-stratification strategy.

## BACKGROUND

Accessible strategies for risk stratification for heart failure (HF) remain elusive despite the availability of evidence-based therapies that can effectively modify the disease trajectory.<sup>1,2</sup> Clinical scores to predict HF risk, such as the pooled cohort equations to prevent HF (PCP-HF), the predicting risk of cardiovascular disease events (PREVENT) equations, and the Health ABC score,<sup>3-5</sup> require extensive clinical evaluation, including detailed history and physical exam, a 12-lead electrocardiogram (ECG), and other specialized testing.<sup>3-9</sup> These complex inputs limit their use, systematically excluding those without healthcare access and preventing deployment for community-based screening.<sup>8-10</sup> Similarly, serum-based biomarkers such as N-terminal pro-B-type natriuretic peptide (NT-proBNP) and high-sensitivity cardiac troponin, which portend a higher risk of HF when elevated, are limited by the need for blood draws and sample storage, and frequent inaccessibility at the point-of-contact.<sup>11-16</sup> Thus, there is an unmet need for a simple and efficient strategy for identifying those at high risk for developing HF in the community.

Given their increasing utility and ubiquity, portable and wearable devices capable of recording single-lead ECG tracings have been proposed as a platform for cardiovascular monitoring and screening.<sup>17-20</sup> Further, artificial intelligence (AI)-enhanced interpretation of ECGs (AI-ECG) has been shown to detect hidden cardiovascular disease signatures from single-lead ECGs, highlighting the potential of these devices for improving cardiovascular health.<sup>21-25</sup> However, these portable ECGs are prone to noise introduction during acquisition, which can limit the AI model performance unless specialized measures are taken to ensure they are resilient to such noise.<sup>21,26</sup> Recently, we reported a novel approach for single-lead ECGs that incorporates random noising during model development, enabling consistent

diagnostic performance across varying levels of real-world noises.<sup>21</sup> This initial deployment of our approach focused on developing a model that detects reduced left ventricular ejection fraction (LVEF) on single-lead ECG based on information from a concurrent echocardiogram, with the potential application of identifying subclinical left ventricular systolic dysfunction (LVSD). Recent studies also suggest that the AI-ECG signature for LVSD identifies other subtle markers of LV dysfunction, including abnormal LV strain and diastolic function, especially among those with a positive screen but preserved LVEF.<sup>27</sup> Of note, each of these is associated with elevated HF risk.<sup>28</sup>

Given the increasing accessibility of single-lead ECGs, we tested the hypothesis that an AI model developed to detect the cross-sectional signature of LVSD from single-lead ECG tracings can predict future HF risk. We longitudinally evaluated our approach in individuals undergoing outpatient ECGs within a diverse US health system and two large population-based cohorts in the UK and Brazil.

## **METHODS**

### **Data Sources**

We included three large cohorts spanning different countries and settings who had undergone an ECG: (i) individuals seeking outpatient care in the Yale New Haven Health System (YNHHS), a large healthcare system in the Northeastern US, including five independent hospitals and an outpatient medical network, (ii) participants in the UK Biobank, a nationwide UK-based cohort study, and (iii) participants in the Brazilian Longitudinal Study of Adult Health (ELSA-Brasil), the largest community-based cohort study from Brazil. While YNHHS included testing and follow-up as a part of routine clinical care in an integrated health system,

participants in UKB and ELSA-Brasil had detailed protocolized evaluation at baseline and comprehensive longitudinal follow-up (**eMethods**).

## **Study Population**

In YNHHS, to approximate a cohort resembling a screening setting, we identified patients undergoing a 12-lead ECG in an outpatient health encounter during 2014-2023 without HF before the ECG. To account for the ECGs potentially being obtained as a part of a workup for HF, we included a 1-year blanking period from the first recorded encounter in the electronic health records (EHR) to identify those with prevalent HF (**eMethods; eFigure 1**). In YNHHS, 255,604 individuals had at least one outpatient ECG after the blanking period. We excluded 47,720 patients in the original model development population and 11,954 patients with prevalent HF. To further focus the cohort on those without established precursors of HF, we excluded 1,590 patients with LV dysfunction (LVEF under 50% or moderate/severe LV diastolic dysfunction) and 1,673 patients with an NT-proBNP of >300 pg/mL before the index ECG (**eFigure 2**).

To avoid selection bias in UKB and ELSA-Brasil, we identified all participants who received an ECG as part of the study protocol. In UKB, we included 42,366 participants who had undergone a 12-lead ECG during their imaging study visit in 2014-2020. We used the linkage with the EHR from the UK National Health Service to exclude 225 participants who had been hospitalized with a principal or secondary discharge diagnosis of HF before the ECG. In ELSA-Brasil, we included 13,739 participants who had undergone a 12-lead ECG during 2008-2010, excluding those with an HF diagnosis (N=227) or with an LVEF under 50% (N=58) on their baseline echocardiogram (**eFigure 2**).

## Study Outcomes

We defined the study outcome as new-onset HF characterized by HF hospitalizations. In YNHHS, this was defined as a hospitalization with an International Classification of Disease Tenth Revision – Clinical Modification (ICD-10-CM) code for HF as the principal discharge diagnosis (**eTable 1**). This approach was guided by the over 95% specificity of HF diagnosis codes, especially as the principal discharge diagnosis, for a clinical diagnosis of HF.<sup>29</sup> Similarly, in UKB, we used the linked EHR to identify hospitalizations with HF as the principal diagnosis code. In ELSA-Brasil, HF was identified by in-person interview or telephonic surveillance for all hospitalizations, followed by independent medical record review and adjudication of HF hospitalizations by two cardiologists (**eMethods**).<sup>30</sup>

We further evaluated the association of AI-ECG probabilities with alternate definitions of new-onset HF, and composite outcomes, including (i) any hospitalization with a principal or secondary HF diagnosis code, (ii) a subsequent echocardiogram with LVEF under 50%, and (iii) a composite outcome of HF or all-cause death (**eMethods**). To evaluate the specificity of AI-ECG-defined HF risk, we examined the risk of other cardiovascular conditions, including acute myocardial infarction (AMI), stroke hospitalizations, and all-cause mortality (**eTable 1**). A composite outcome of major adverse cardiovascular events (MACE) was defined as death or hospitalization for HF, AMI, or stroke.

## Study Exposure

We defined the study exposure as the output probability of an AI-ECG model trained to detect concurrent LVSD on lead I of a 12-lead ECG, representing the lead



commonly captured by portable ECG devices.<sup>21</sup> This was developed at the Yale New Haven Hospital (YNHH) using a novel approach of augmenting training data with random Gaussian noise (**eMethods**). The model achieved excellent discrimination (area under the receiver operating characteristic curve of 0.899 [95% CI, 0.889-0.909]) for detecting concurrent LVSD in the YNHH held-out test set and performed consistently across clinical and population-based external validation cohorts (**eTable 2; eFigure 3**).

We deployed this established model without further development to lead I ECG signals across included individuals to obtain the LVSD probability, representing a continuous HF risk score. We defined a positive AI-ECG screen as an output probability greater than 0.08, representing the model threshold for 90% sensitivity for detecting LVSD during internal validation.<sup>21</sup>

### **Study Comparator**

We compared the performance of the AI-ECG algorithm with established risk scores for predicting HF risk, including the PCP-HF and the PREVENT equations. The PCP-HF score was developed and validated in 7 community-based cohorts.<sup>4</sup> It uses 12 input features, including demographics (age, sex, race), physical exam-based features (smoking status, BMI, systolic blood pressure), laboratory measurements (total cholesterol, high-density lipoprotein cholesterol, fasting blood glucose), medication history (use of antihypertensive and antihyperglycemic medications), and electrocardiographically-defined QRS duration. The PREVENT equations were recently developed using data from over 3.2 million individuals and were validated in 21 datasets.<sup>5,33</sup> The PREVENT equations for HF risk prediction employ 8 inputs, entailing demographics (age, sex), medical history (type 2 diabetes mellitus),

physical exam-based features (smoking status, BMI, systolic blood pressure), laboratory measurements (estimated glomerular filtration rate), and medication history (antihypertensive medication use). Across cohorts, these features were determined using the EHR and/or study visits (**eMethods**).<sup>34–37</sup>

### **Statistical Analysis**

We used age-, sex-, and comorbidity-adjusted Cox proportional hazard models with time-to-first HF event as the dependent variable and the AI-ECG-based screen results (positive/negative) or continuous model probability as the independent variable to evaluate the association of the model output with HF risk. Multi-outcome Fine-Gray subdistribution hazard models were used to account for the competing risk of death.<sup>38</sup>

The incremental discrimination of AI-ECG over PCP-HF and PREVENT equations for predicting time-to-HF hospitalization was reported as the difference in Harrel's C-statistics and 95% confidence interval (CI) using a one-shot nonparametric approach.<sup>39</sup> We calculated integrated discrimination improvement (IDI), and categorical and continuous time-to-event net reclassification improvement (NRI).<sup>40</sup> We further compared the net benefit of the AI-ECG model with the PCP-HF and PREVENT equations across all probability thresholds (**eMethods**).<sup>41</sup>

## **RESULTS**

### **Study Population**

From YNHHS, we included 192,667 individuals with a median age of 56 years (IQR, 41-69), comprising 111,181 (57.7%) women, 117,857 (61.2%) non-Hispanic White, 30,623 (15.9%) non-Hispanic Black, and 33,256 (17.3%) Hispanic individuals. Over a median 4.6-year follow-up (IQR, 2.8-6.6), 3,697 (1.9%) had an HF hospitalization,

7,514 (3.9%) had an HF hospitalization or an LVEF below 50% on subsequent echocardiogram, and 10,381 (5.4%) died (**Table 1, eTable 3**).

The 42,141 UKB participants had a median age of 65 years (IQR, 59-71), including 21,795 (51.7%) women, with 40,691 (96.6%) identifying as White and 304 (0.7%) as Black. Over a median follow-up of 3.1 years (IQR, 2.1-4.5), 46 (0.1%) had an HF hospitalization, and 346 (0.8%) died (**Table 1**).

From ELSA-Brasil, the 13,454 participants had a median age of 51 years (IQR, 45-58), comprising 7,348 (54.6%) women, 6,920 (51.4%) adults identifying as White, 2,130 (15.8%) as Black, and 3,767 (28.0%) as “Pardo”. Over a median of 4.2 years (IQR, 3.7-4.5), 31 (0.2%) people developed HF, and 229 (1.7%) died.

### **Risk Stratification for New-Onset HF**

In YNHHS, 42,775 (22.2%) patients screened positive on the AI model applied to the baseline single-lead ECG signal. A positive screen was associated with over 5-fold higher risk of developing HF (HR 5.05 [95% CI, 4.73-5.39]; **Table 2**). After accounting for differences in age and sex, a positive AI-ECG screen was associated with a 3.3-fold higher risk of HF compared with a negative screen (adjusted HR [aHR], 3.31 [95% CI, 3.10-3.54]). The association remained statistically significant after accounting for differences in HF risk factors of prior ischemic heart disease, hypertension, type 2 diabetes, and obesity (aHR 2.81 [95% CI, 2.63-3.01]) and after additionally accounting for the competing risk of death (aHR of 2.73 [95% CI, 2.55-2.93]). The association of a positive screen with an elevated risk of HF was noted across YNHHS sites (**eTable 4**), demographic subgroups (**eTable 5**), and different HF definitions (**eTables 6-7**).

In UKB, 5,513 (13.1%) participants screened positive with the AI-ECG model. A positive AI-ECG screen portended a 7.5-fold higher hazard for developing HF (HR 7.52 [95% CI, 4.21-13.41]). After accounting for age, sex, HF risk factors, and the competing risk of death, screen-positive participants had a 5-fold higher risk of HF (aHR 5.02 [95% CI, 2.77-9.09]; **Table 2**).

In the ELSA-Brasil cohort, 1,928 (14.3%) participants had a positive AI-ECG screen, with a 9-fold higher risk for HF (age- and sex-adjusted HR 8.74 [95% CI, 4.13-18.48]) compared with screen-negative participants. This association was consistent even after accounting for the comorbidities and the competing risk of death (aHR 7.71 [95% CI, 3.62-16.46]).

### **Risk Across Model Probability Increments**

Across the YNHHS network, each 0.1 increment in the model output probability portended a 28% higher hazard of developing HF, adjusted for age, sex, comorbidities, and accounting for the competing risk of death (aHR 1.28 [95% CI, 1.26-1.30]; **Table 2**). Higher model probabilities were progressively associated with higher HF risk across various probability bins, with consistent patterns across the individual hospitals and the outpatient medical network (**eFigure 4, eTables 4, 8-9**).

Across both UKB and ELSA-Brasil cohorts, a 0.1 increment in model probability was associated with 51% and 66% higher adjusted risk of HF (aHR 1.49 [95% CI, 1.36-1.63] and aHR 1.65 [95% CI, 1.46-1.87], respectively, **Table 2**), respectively.

### **Comparison with PCP-HF and PREVENT Equations**

The AI-ECG model had a discrimination based on Harrel's C-statistic of 0.723 (95% CI, 0.701-0.744) in YNHHS, compared with 0.634 (95% CI, 0.612-0.656) for PCP-HF ( $p < 0.001$ ), and 0.668 (95% CI, 0.644-0.693) for PREVENT equations ( $p < 0.001$ ; **Table 3**). In UKB and ELSA-Brasil, the AI-ECG model's discrimination for HF was 0.792 (95% CI, 0.696-0.889) and 0.833 (95% CI, 0.720-0.946), respectively, which was not significantly different from the clinical risk scores (AI-ECG vs PCP-HF:  $p_{UKB}=0.45$ ;  $p_{ELSA-Brasil}=0.87$ ; AI-ECG vs PREVENT:  $p_{UKB}=0.90$ ;  $p_{ELSA-Brasil}=0.92$ ). Across cohorts, incorporating AI-ECG predictions in addition to PCP-HF and PREVENT equations resulted in improved Harrel's C-statistic ( $\Delta_{PCP-HF}=0.112-0.114$ ;  $\Delta_{PREVENT}=0.080-0.101$ ), compared with the use of the clinical risk equations alone (**Table 3**).

Compared with the PCP-HF and PREVENT scores, the AI-ECG algorithm had a positive IDI across all study cohorts. The AI model was associated with a significant improvement in continuous NRI at YNHHS, but not in the UKB and ELSA-Brasil (**Table 4**). However, the AI model significantly improved categorical NRI across all data sources. This improvement in categorical NRI was driven by improved event NRI, reclassification of cases, while non-event NRI decreased (**eTable 10**). Despite the differential improvement in reclassifying cases and controls, the AI-ECG's PPV was comparable with PCP-HF and PREVENT across sites (**eTable 11**). The AI-ECG model demonstrated consistent superior net benefit over PCP-HF across all probability thresholds in UKB and ELSA-Brasil. In YNHHS, the net benefit of AI-ECG was higher than that of PCP-HF and PREVENT equations in probability thresholds greater than 0.04, where the AI-ECG threshold is 0.08 (**eFigure 5**). A positive AI-ECG screen was an independent predictor of HF risk after

accounting for PCP-HF score, with consistent patterns across racial groups (eFigures 6-7).

### **Non-HF Cardiovascular Outcome Prediction**

In YNHHS, a positive AI-ECG screen was associated with a modestly elevated risk of stroke and MACE (age- and sex-adjusted HRs: stroke, 1.17; MACE, 1.77; eTables 12-13) compared with a 3-fold increase in HF risk. In UKB and ELSA-Brasil, a positive screen portended a 1.5- to 4-fold hazard of stroke, death, and MACE compared with a 6- to 9-fold increase in HF risk.

## **DISCUSSION**

Across clinically and geographically distinct cohorts, a noise-adapted AI model, trained to detect cross-sectional LVSD from only a lead I ECG, predicted the risk of future HF among individuals seeking outpatient care and community-dwelling adults. Individuals with a positive AI-ECG screen had a 3- to 7-fold higher risk of developing HF compared with those with a negative screen, independent of known demographic and clinical risk factors. Higher AI-ECG probabilities were progressively associated with a higher risk of HF, with each 10% increment portending a 27-65% higher risk-adjusted hazard for HF across all cohorts. Further, the AI-ECG model demonstrated incremental discrimination, improved reclassification, and superior net benefit over the PCP-HF score. Therefore, our AI-based approach presents ideal characteristics for use as a non-invasive digital biomarker for elevated HF risk using a single-lead ECG.

Applications of deep learning for ECGs have demonstrated the ability to identify subtle signatures of structural heart disorders previously considered

electrically silent,<sup>42–51</sup> with applications extending to detecting LVSD from single-lead tracings.<sup>21,52–55</sup> Further, the US Food and Drug Administration recently cleared an AI tool using electronic stethoscope-based single-lead ECGs for cross-sectional LVSD detection.<sup>56</sup> Our study demonstrates that a noise-adapted AI-ECG model can predict new-onset HF risk using single-lead ECG tracings. Given the increasing accessibility of portable and wearable devices capable of acquiring ECG signals outside a clinical setting,<sup>20,57,58</sup> this approach can potentially be applied widely to identify individuals at a high risk of HF.<sup>58</sup> While the ECGs acquired with these devices are often distorted by positioning and movement of electrodes or artifacts due to skeletal muscle contraction during acquisition,<sup>26,59</sup> our unique noise-adapted training approach can enable reliable inference from these noisy ECGs.<sup>56</sup>

In this study, we opted for a definition of HF based on the principal discharge diagnosis code, a criterion with high specificity.<sup>29</sup> Nonetheless, the association of a positive screen with elevated HF risk was consistent across several sensitivity analyses defining the condition differently in YNHHS and UKB, and in ELSA-Brasil where the outcomes were explicitly adjudicated. The robust performance across clinically and demographically distinct cohorts indicates that the model captures a predictive HF signature independent of site-specific coding practices.<sup>61–63</sup> Moreover, the dose-dependent association of higher AI-ECG scores with progressively elevated HF risk enables graded risk stratification and risk-informed management. Notably, while a positive screen was also associated with a modestly elevated risk of other cardiovascular outcomes, including MACE, the predictive signature was more specific for HF.

Our study has important implications for defining HF risk. While several clinical risk score- and serum biomarker-based strategies have been proposed to

identify those at high risk, these strategies often require extensive clinical evaluation and blood testing.<sup>61,62</sup> This limits their scope to patients with established access to healthcare services.<sup>9,16,64–66</sup> In contrast, our AI-based approach using single-lead ECG tracings may offer a means for HF risk stratification outside clinical settings. Notably, the model demonstrated positive IDI, improved reclassification, and greater net benefit compared with PCP-HF and PREVENT scores. Across all sites, the model also had incremental discrimination over the use of the clinical risk scores alone. While AI-ECG had comparable discrimination and did not improve continuous NRI over PCP-HF and PREVENT scores in the UKB and ELSA-Brasil, it showed a consistent improvement in categorical NRI. The categorical NRI is relevant for clinical decision-making, as it considers thresholds for guiding treatment and follow-up.<sup>60</sup> Furthermore, the model's PPV was comparable to PCP-HF and PREVENT, suggesting that an AI-ECG-based strategy for screening will not lead to unnecessary additional testing.

The ability to use a single portable device to record ECGs for multiple individuals could support the design of efficient community-based screening programs.<sup>67,68</sup> Successful health promotion strategies, such as targeted hypertension management in barbershops and cancer screening in churches across the US,<sup>69,70</sup> can be adapted to promote HF screening, especially among those traditionally less likely to seek preventive medical care.<sup>64</sup> The ease of use and the brief time for ECG acquisition with these devices can enable a non-laboratory-based strategy, potentially suitable for integration into national-level non-communicable disease screening programs globally, especially in low- and middle-income countries.<sup>67,68,71</sup> This scalability and potential community health benefits necessitate prospective clinical and cost-effectiveness assessments for AI-based HF risk stratification.



Our study has certain limitations. First, waveforms extracted from the lead I of clinical ECGs may not be identical to those from portable devices. While our noise-augmentation approach previously demonstrated sustained performance on ECGs with real-world noises,<sup>70,71</sup> prospective validation of the model on portable- and wearable-acquired ECGs is necessary before deployment for community HF screening. This includes evaluating device types, acquisition methods, preprocessing techniques, and handling of ECG segments of longer durations. Second, despite YNHHS's wide geographic coverage, out-of-hospital clinical outcomes may not have been captured, thereby representing a lower HF risk compared with the protocolized follow-up in UKB and ELSA-Brasil. Moreover, while we included only ECGs performed in an outpatient setting, the patients who underwent ECG testing were clinically selected, indicating an unmeasured potential risk profile of those who underwent a clinical ECG but had a negative AI-ECG screen. However, the controls in this setting all underwent ECG screens as well. Third, the number of HF outcome events was low in the UKB and ELSA-Brasil. However, the HF hospitalization rates were comparable to other population-based cohorts,<sup>72,73</sup> and the outcome capture and adjudication in UKB and ELSA-Brasil have been extensively validated.<sup>31,74-78</sup> Fourth, given the lack of NT-proBNP assessments in UKB and ELSA-Brasil, we could not evaluate NT-proBNP as a comparator in this study. In YNHHS, the use of NT-proBNP could incorporate substantial selection bias, since it is typically ordered for evaluation of cardiopulmonary symptoms and rarely for primary prevention. Nevertheless, a future head-to-head assessment of AI-ECG and NT-proBNP as predictors for HF is warranted. Further, while performed an analysis that excluded individuals with elevated pre-ECG NT-proBNP levels in YNHHS, the lack of NT-proBNP testing precluded this analysis in UKB and ELSA-

Brasil. Finally, while the AI-ECG approach identifies individuals at elevated HF risk, it is not clear if this risk is modifiable. Nonetheless, a robust screening strategy can enable targeted management of known HF risk factors.

## **CONCLUSION**

Across clinically and geographically distinct cohorts, we used a noise-resilient AI model with a lead I ECG tracing as the sole input to define the risk of future HF, with value over conventional risk scores in both performance and ease of deployment. With the increasing availability of single-lead ECGs on portable and wearable devices, this AI-ECG-based non-invasive digital biomarker can enable scalable stratification of HF risk across communities.

## **ACKNOWLEDGMENTS**

### **Author Contributions**

Drs Dhingra, Aminorroaya, and Khera had full access to all of the data in the study and take responsibility for the integrity of the data and the accuracy of the data analysis. All authors approved the final version for submission.

*Study concept and design:* Dhingra, Lovedeep S; Aminorroaya, Arya; Oikonomou, Evangelos K; Khera, Rohan.

*Acquisition, analysis, or interpretation of data:* Dhingra, Lovedeep S; Aminorroaya, Arya; Pedroso Camargos, Aline; Khunte, Akshay; Sangha, Veer; McIntyre, Daniel; Chow, Clara K; Asselbergs, Folkert W; Brant, Luisa CC; M Barreto, Sandhi; Ribeiro, Antonio Luiz P; Krumholz, Harlan M; Oikonomou, Evangelos K; Khera, Rohan

*Drafting of the manuscript:* Dhingra, Lovedeep S; Aminorroaya, Arya; Pedroso Camargos, Aline.

*Critical revision of the manuscript for important intellectual content:* Khunte, Akshay; Sangha, Veer; McIntyre, Daniel; Chow, Clara K; Asselbergs, Folkert W; Brant, Luisa CC; M Barreto, Sandhi; Ribeiro, Antonio Luiz P; Krumholz, Harlan M; Oikonomou, Evangelos K; Khera, Rohan.

*Statistical analysis:* Dhingra, Lovedeep S; Aminorroaya, Arya.

*Obtained funding:* Khera, Rohan.

*Administrative, technical, or material support:* Aminorroaya, Arya; Dhingra, Lovedeep S; Pedroso Camargos, Aline; Khera, Rohan.

*Study supervision:* Khera, Rohan.

### **Conflict of Interest Disclosures**

Dr. Khera is an Associate Editor of JAMA. Dr. Khera and Mr. Sangha are the coinventors of U.S. Provisional Patent Application No. 63/346,610, “Articles and methods for format-independent detection of hidden cardiovascular disease from printed electrocardiographic images using deep learning” and are co-founders of Ensign-AI. Dr. Khera receives support the National Institutes of Health (under awards R01AG089981, R01HL167858, and K23HL153775) and the Doris Duke Charitable Foundation (under award 2022060). He receives support from the Blavatnik Foundation through the Blavatnik Fund for Innovation at Yale. He also receives research support, through Yale, from Bristol-Myers Squibb, BridgeBio, and Novo Nordisk. In addition to 63/346,610, Dr. Khera is a coinventor of U.S. Pending Patent Applications WO2023230345A1, US20220336048A1, 63/484,426, 63/508,315, 63/580,137, 63/606,203, 63/619,241, and 63/562,335. Dr. Khera and Dr. Oikonomou are co-founders of Evidence2Health, a precision health platform to improve evidence-based cardiovascular care. Dr. Oikonomou is a co-inventor of the

U.S. Patent Applications 63/508,315 & 63/177,117 and has been a consultant to Caristo Diagnostics Ltd (all outside the current work). Dr. Krumholz works under contract with the Centers for Medicare & Medicaid Services to support quality measurement programs. He is associated with research contracts through Yale University from Janssen, Kenvue, and Pfizer. In the past three years, Dr. Krumholz received options for Element Science and Identifeye and payments from F-Prime for advisory roles. He is a co-founder of and holds equity in Hugo Health, Refactor Health, and Ensign-AI. Dr. Ribeiro is supported in part by the National Council for Scientific and Technological Development - CNPq (grants 465518/2014-1, 310790/2021-2, 409604/2022-4 e 445011/2023-8). Dr. Brant is supported in part by CNPq (307329/2022-4). Dr. Asselbergs is supported by Heart4Data, which received funding from the Dutch Heart Foundation and ZonMw (2021-B015), and UCL Hospitals NIHR Biomedical Research Centre.

### **Funding/Support**

Dr. Khera was supported by the National Institutes of Health (under awards R01AG089981, R01HL167858, and K23HL153775) and the Doris Duke Charitable Foundation (under award 2022060). Dr. Oikonomou was supported by the National Heart, Lung, and Blood Institute of the National Institutes of Health (under award 1F32HL170592).

### **Role of the Funder/Sponsor**

The funders had no role in the design and conduct of the study; collection, management, analysis, and interpretation of the data; preparation, review, or approval of the manuscript; and decision to submit the manuscript for publication.

## **Disclaimer**

The views expressed in this article are those of the authors and not necessarily any funders.

## **Data Sharing Statement**

The data from the Yale New Haven Health System represent protected health information. To protect patient privacy, the Yale Institutional Review Board does not allow the sharing of these data. Data from the UK Biobank and the Brazilian Longitudinal Study of Adult Health are available for research to licensed users. The code for cohort creation and statistical analyses is publicly available at <https://github.com/CarDS-Yale/AI-ECG-HF-Pred>.

## REFERENCES

1. Shahim B, Kapelios CJ, Savarese G, Lund LH. Global public health burden of heart failure: An updated review. *Card Fail Rev.* 2023;9. doi:10.15420/cfr.2023.05
2. Bozkurt B, Ahmad T, Alexander KM, et al. Heart failure epidemiology and outcomes statistics: A report of the heart failure society of America. *J Card Fail.* 2023;29(10):1412-1451.
3. Butler J, Kalogeropoulos A, Georgiopoulou V, et al. Incident Heart Failure Prediction in the Elderly. *Circ Heart Fail.* 2008;1(2):125-133.
4. Khan SS, Ning H, Shah SJ, et al. 10-Year Risk Equations for Incident Heart Failure in the General Population. *J Am Coll Cardiol.* 2019;73(19):2388-2397.
5. Khan SS, Matsushita K, Sang Y, et al. Development and validation of the American heart association's PREVENT equations. *Circulation.* 2024;149(6):430-449.
6. Pandey A, Khan MS, Patel KV, Bhatt DL, Verma S. Predicting and preventing heart failure in type 2 diabetes. *Lancet Diabetes Endocrinol.* 2023;11(8):607-624.
7. Kalogeropoulos A, Psaty BM, Vasani RS, et al. Validation of the Health ABC Heart Failure Model for Incident Heart Failure Risk Prediction. *Circ Heart Fail.* 2010;3(4):495-502.
8. Echouffo-Tcheugui JB, Greene SJ, Papadimitriou L, et al. Population Risk Prediction Models for Incident Heart Failure. *Circ Heart Fail.* 2015;8(3):438-447.
9. Nadarajah R, Younsi T, Romer E, et al. Prediction models for heart failure in the community: A systematic review and meta-analysis. *Eur J Heart Fail.* 2023;25(10):1724-1738.
10. Agarwal SK, Chambless LE, Ballantyne CM, et al. Prediction of Incident Heart Failure in General Practice. *Circ Heart Fail.* 2012;5(4):422-429.
11. Grewal J, McKelvie R, Lonn E, et al. BNP and NT-proBNP predict echocardiographic severity of diastolic dysfunction. *Eur J Heart Fail.* 2008;10(3):252-259.
12. Campbell DJ, Gong FF, Jelinek MV, et al. Prediction of incident heart failure by serum amino-terminal pro-B-type natriuretic peptide level in a community-based cohort. *Eur J Heart Fail.* 2019;21(4):449-459.
13. Yan I, Börschel CS, Neumann JT, et al. High-sensitivity cardiac troponin I levels and prediction of heart failure: Results from the BiomarCaRE consortium. *JACC Heart Fail.* 2020;8(5):401-411.

14. Kelder JC, Cowie MR, McDonagh TA, et al. Quantifying the added value of BNP in suspected heart failure in general practice: an individual patient data meta-analysis. *Heart*. 2011;97(12):959-963.
15. Jia X, Al Rifai M, Hoogeveen R, et al. Association of Long-term Change in N-Terminal Pro-B-Type Natriuretic Peptide With Incident Heart Failure and Death. *JAMA Cardiol*. 2023;8(3):222-230.
16. Watson CJ, Gallagher J, Wilkinson M, et al. Biomarker profiling for risk of future heart failure (HFpEF) development. *J Transl Med*. 2021;19(1):61.
17. Al-Alusi MA, Khurshid S, Wang X, et al. Trends in Consumer Wearable Devices With Cardiac Sensors in a Primary Care Cohort. *Circ Cardiovasc Qual Outcomes*. 2022;15(7):e008833.
18. Gehr S, Russmann C. Shaping the future of cardiovascular medicine in the new era of wearable devices. *Nat Rev Cardiol*. 2022;19(8):501-502.
19. Aminorroaya Arya, Dhingra Lovedeep S., Nargesi Arash A., Oikonomou Evangelos K., Krumholz Harlan M., Khera Rohan. Use of Smart Devices to Track Cardiovascular Health Goals in the United States. *JACC: Advances*. 2023;2(7):100544.
20. Dhingra LS, Aminorroaya A, Oikonomou EK, et al. Use of Wearable Devices in Individuals With or at Risk for Cardiovascular Disease in the US, 2019 to 2020. *JAMA Netw Open*. 2023;6(6):e2316634.
21. Khunte A, Sangha V, Oikonomou EK, et al. Detection of left ventricular systolic dysfunction from single-lead electrocardiography adapted for portable and wearable devices. *NPJ Digit Med*. 2023;6(1):124.
22. Shankar SV, Oikonomou EK, Khera R. CarDS-Plus ECG Platform: Development and Feasibility Evaluation of a Multiplatform Artificial Intelligence Toolkit for Portable and Wearable Device Electrocardiograms. *medRxiv*. Published online October 3, 2023. doi:10.1101/2023.10.02.23296404
23. Mathews SM, Kambhamettu C, Barner KE. A novel application of deep learning for single-lead ECG classification. *Comput Biol Med*. 2018;99:53-62.
24. Dupulthys S, Dujardin K, Anné W, et al. Single-lead electrocardiogram Artificial Intelligence model with risk factors detects atrial fibrillation during sinus rhythm. *Europace*. 2024;26(2):euad354.
25. Gibson CM, Mehta S, Ceschim MRS, et al. Evolution of single-lead ECG for STEMI detection using a deep learning approach. *Int J Cardiol*. 2022;346:47-52.
26. Bläsing D, Buder A, Reiser JE, Nisser M, Derlien S, Vollmer M. ECG performance in simultaneous recordings of five wearable devices using a new morphological noise-to-signal index and Smith-Waterman-based RR interval comparisons. *PLoS One*. 2022;17(10):e0274994.

27. Oikonomou EK, Sangha V, Dhingra LS, et al. Artificial intelligence-enhanced risk stratification of cancer therapeutics-related cardiac dysfunction using electrocardiographic images. *Circ Cardiovasc Qual Outcomes*. Published online September 2, 2024. doi:10.1161/CIRCOUTCOMES.124.011504
28. Haji K, Huynh Q, Wong C, Stewart S, Carrington M, Marwick TH. Improving the characterization of stage A and B heart failure by adding global longitudinal strain. *JACC Cardiovasc Imaging*. 2022;15(8):1380-1387.
29. McCormick N, Lacaille D, Bhole V, Avina-Zubieta JA. Validity of heart failure diagnoses in administrative databases: A systematic review and meta-analysis. *PLoS One*. 2014;9(8):e104519.
30. Dicionários de variáveis e Data Books. Elsa. October 26, 2021. Accessed March 6, 2024. <http://elsabrasil.org/pesquisadores/dicionarios-de-variaveis-e-data-books/>
31. Schmidt MI, Duncan BB, Mill JG, et al. Cohort profile: Longitudinal study of adult health (ELSA-brasil). *Int J Epidemiol*. 2015;44(1):68-75.
32. IBGE. Accessed March 31, 2024. <https://www.ibge.gov.br/en/home-eng.html>
33. Khan SS, Coresh J, Pencina MJ, et al. Novel prediction equations for absolute risk assessment of total cardiovascular disease incorporating cardiovascular-kidney-metabolic health: A scientific statement from the American Heart Association. *Circulation*. 2023;148(24):1982-2004.
34. Littlejohns TJ, Sudlow C, Allen NE, Collins R. UK Biobank: opportunities for cardiovascular research. *Eur Heart J*. 2019;40(14):1158-1166.
35. Elliott P, Peakman TC, UK Biobank. The UK Biobank sample handling and storage protocol for the collection, processing and archiving of human blood and urine. *Int J Epidemiol*. 2008;37(2):234-244.
36. Mill JG, Pinto K, Griep RH, et al. Medical assessments and measurements in ELSA-Brasil. *Rev Saude Publica*. 2013;47 Suppl 2:54-62.
37. Bensenor IM, Griep RH, Pinto KA, et al. Routines of organization of clinical tests and interviews in the ELSA-Brasil investigation center. *Rev Saude Publica*. 2013;47 Suppl 2:37-47.
38. Austin PC, Fine JP. Practical recommendations for reporting Fine-Gray model analyses for competing risk data. *Stat Med*. 2017;36(27):4391-4400.
39. Kang L, Chen W, Petrick NA, Gallas BD. Comparing two correlated C indices with right-censored survival outcome: a one-shot nonparametric approach. *Stat Med*. 2015;34(4):685-703.
40. Pencina MJ, D'Agostino RB Sr, Steyerberg EW. Extensions of net reclassification improvement calculations to measure usefulness of new biomarkers. *Stat Med*. 2011;30(1):11-21.



41. Vickers AJ, Van Calster B, Steyerberg EW. Net benefit approaches to the evaluation of prediction models, molecular markers, and diagnostic tests. *BMJ*. 2016;352:i6.
42. Sangha V, Nargesi AA, Dhingra LS, et al. Detection of Left Ventricular Systolic Dysfunction From Electrocardiographic Images. *Circulation*. Published online July 25, 2023. doi:10.1161/CIRCULATIONAHA.122.062646
43. Attia ZI, Kapa S, Lopez-Jimenez F, et al. Screening for cardiac contractile dysfunction using an artificial intelligence-enabled electrocardiogram. *Nat Med*. 2019;25(1):70-74.
44. Bjerkén LV, Rønberg SN, Jensen MT, Ørting SN, Nielsen OW. Artificial intelligence enabled ECG screening for left ventricular systolic dysfunction: a systematic review. *Heart Fail Rev*. 2023;28(2):419-430.
45. König S, Hohenstein S, Nitsche A, et al. Artificial intelligence-based identification of left ventricular systolic dysfunction from 12-lead electrocardiograms: External validation and advanced application of an existing model. *Eur Heart J Digit Health*. doi:10.1093/ehjdh/ztad081
46. Acharya UR, Fujita H, Oh SL, et al. Deep convolutional neural network for the automated diagnosis of congestive heart failure using ECG signals. *Applied Intelligence*. 2019;49(1):16-27.
47. Sudarshan VK, Acharya UR, Oh SL, et al. Automated diagnosis of congestive heart failure using dual tree complex wavelet transform and statistical features extracted from 2s of ECG signals. *Comput Biol Med*. 2017;83:48-58.
48. Dhingra LS, Sangha V, Aminorroaya A, et al. A multicenter evaluation of the impact of procedural and pharmacological interventions on deep learning-based electrocardiographic markers of hypertrophic cardiomyopathy. *bioRxiv*. Published online January 16, 2024. doi:10.1101/2024.01.15.24301011
49. Sangha V, Dhingra LS, Oikonomou EK, et al. Identification of hypertrophic cardiomyopathy on electrocardiographic images with deep learning. *medRxiv*. Published online December 28, 2023:2023.12.23.23300490. doi:10.1101/2023.12.23.23300490
50. Dhingra LS, Aminorroaya A, Sangha V, et al. Scalable risk stratification for heart failure using artificial intelligence applied to 12-lead electrocardiographic images: A multinational study. *bioRxiv*. Published online April 3, 2024. doi:10.1101/2024.04.02.24305232
51. Aminorroaya A, Dhingra LS, Sangha V, et al. Deep learning-enabled detection of aortic stenosis from noisy single lead electrocardiograms. *medRxiv*. Published online 2023. doi:10.1101/2023.09.29.23296310
52. Attia ZI, Harmon DM, Dugan J, et al. Prospective evaluation of smartwatch-enabled detection of left ventricular dysfunction. *Nat Med*. 2022;28(12):2497-2503.

53. Attia ZI, Dugan J, Rideout A, et al. Automated detection of low ejection fraction from a one-lead electrocardiogram: application of an AI algorithm to an electrocardiogram-enabled Digital Stethoscope. *Eur Heart J Digit Health*. 2022;3(3):373-379.
54. Bachtiger P, Petri CF, Scott FE, et al. Point-of-care screening for heart failure with reduced ejection fraction using artificial intelligence during ECG-enabled stethoscope examination in London, UK: a prospective, observational, multicentre study. *Lancet Digit Health*. 2022;4(2):e117-e125.
55. Aminorroaya A, Dhingra LS, Pedroso Camargos A, et al. Development and multinational validation of an ensemble deep learning algorithm for detecting and predicting structural heart disease using noisy single-lead electrocardiograms. *medRxiv*. Published online October 8, 2024:2024.10.07.24314974.
56. U.S. Food & Drug Administration. 21 CFR 870.2380 Eko Low Ejection Fraction Tool (ELEFT). Published online March 28, 2024. [https://www.accessdata.fda.gov/cdrh\\_docs/pdf23/K233409.pdf](https://www.accessdata.fda.gov/cdrh_docs/pdf23/K233409.pdf)
57. Kumar S, Victoria-Castro AM, Melchinger H, et al. Wearables in cardiovascular disease. *J Cardiovasc Transl Res*. Published online September 9, 2022. doi:10.1007/s12265-022-10314-0
58. Singhal A, Cowie MR. The role of wearables in heart failure. *Curr Heart Fail Rep*. 2020;17(4):125-132.
59. Lacirignola F, Pasero E. Hardware design of a wearable ECG-sensor: Strategies implementation for improving CMRR and reducing noise. In: *2017 European Conference on Circuit Theory and Design (ECCTD)*. IEEE; 2017. doi:10.1109/ecctd.2017.8093244
60. Cook NR. Clinically relevant measures of fit? A note of caution. *Am J Epidemiol*. 2012;176(6):488-491.
61. Dhingra LS, Shen M, Mangla A, Khara R. Cardiovascular Care Innovation through Data-Driven Discoveries in the Electronic Health Record. *Am J Cardiol*. 2023;203:136-148.
62. Nargesi AA, Adejumo P, Dhingra LS, et al. Automated identification of heart failure with reduced ejection fraction using deep learning-based natural language processing. *JACC Heart Fail*. Published online October 9, 2024. doi:10.1016/j.jchf.2024.08.012
63. Adejumo P, Thangaraj PM, Dhingra LS, et al. Natural language processing of clinical documentation to assess functional status in patients with heart failure. *JAMA Netw Open*. 2024;7(11):e2443925.
64. Sandhu AT, Tisdale RL, Rodriguez F, et al. Disparity in the setting of incident heart failure diagnosis. *Circ Heart Fail*. 2021;14(8). doi:10.1161/circheartfailure.121.008538

65. Lee WC, Serag H, Ohsfeldt RL, et al. Racial disparities in type of heart failure and hospitalization. *J Immigr Minor Health*. 2019;21(1):98-104.
66. Aminorroaya A, Dhingra LS, Oikonomou EK, et al. Development and multinational validation of an algorithmic strategy for high Lp(a) screening. *Nat Cardiovasc Res*. 2024;3(5):558-566.
67. Shah K, Pandya A, Kotwani P, et al. Cost-effectiveness of portable electrocardiogram for screening cardiovascular diseases at a primary health center in Ahmedabad district, India. *Front Public Health*. 2021;9. doi:10.3389/fpubh.2021.753443
68. Chen W, Khurshid S, Singer DE, et al. Cost-effectiveness of Screening for Atrial Fibrillation Using Wearable Devices. *JAMA Health Forum*. 2022;3(8):e222419-e222419.
69. Victor RG, Lynch K, Li N, et al. A cluster-randomized trial of blood-pressure reduction in black barbershops. *N Engl J Med*. 2018;378(14):1291-1301.
70. McNeill LH, Reitzel LR, Escoto KH, et al. Engaging black churches to address cancer health disparities: Project CHURCH. *Front Public Health*. 2018;6. doi:10.3389/fpubh.2018.00191
71. Proietti M, Farcomeni A, Goethals P, et al. Cost-effectiveness and screening performance of ECG handheld machine in a population screening programme: The Belgian Heart Rhythm Week screening programme. *Eur J Prev Cardiol*. 2019;26(9):964-972.
72. Ciapponi A, Alcaraz A, Calderón M, et al. Burden of heart failure in Latin America: A systematic review and meta-analysis. *Rev Esp Cardiol (Engl Ed)*. 2016;69(11):1051-1060.
73. Conrad N, Judge A, Tran J, et al. Temporal trends and patterns in heart failure incidence: a population-based study of 4 million individuals. *Lancet*. 2018;391(10120):572-580.
74. Ho FK, Zhou Z, Petermann-Rocha F, et al. Association between device-measured physical activity and incident heart failure: A prospective cohort study of 94 739 UK Biobank participants. *Circulation*. 2022;146(12):883-891.
75. Aragam KG, Chaffin M, Levinson RT, et al. Phenotypic refinement of heart failure in a national biobank facilitates genetic discovery. *Circulation*. 2019;139(4):489-501.
76. Rastogi T, Ho FK, Rossignol P, et al. Comparing and contrasting risk factors for heart failure in patients with and without history of myocardial infarction: data from HOMAGE and the UK Biobank. *Eur J Heart Fail*. 2022;24(6):976-984.
77. Pedroso Camargos A, Barreto S, Brant L, et al. Performance of contemporary cardiovascular risk stratification scores in Brazil: an evaluation in the ELSA-Brasil study. *Open Heart*. 2024;11(1):e002762.

78. Fry A, Littlejohns TJ, Sudlow C, et al. Comparison of sociodemographic and health-related characteristics of UK Biobank participants with those of the general population. *Am J Epidemiol.* 2017;186(9):1026-1034.

## FIGURES

**Figure 1. Study Overview.** Abbreviations: BMI, Body Mass Index; BP; Blood Pressure; CNN, Convolutional Neural Network; ECG, Electrocardiogram; EF, Ejection Fraction; EHR, Electronic Health Record; ELSA-Brasil, Brazilian Longitudinal Study of Adult Health; HDL, High-density Lipoprotein Cholesterol; HF, Heart Failure; LV, Left Ventricle; YNH, Yale New Haven Hospital; YNHHS, Yale New Haven Health System.

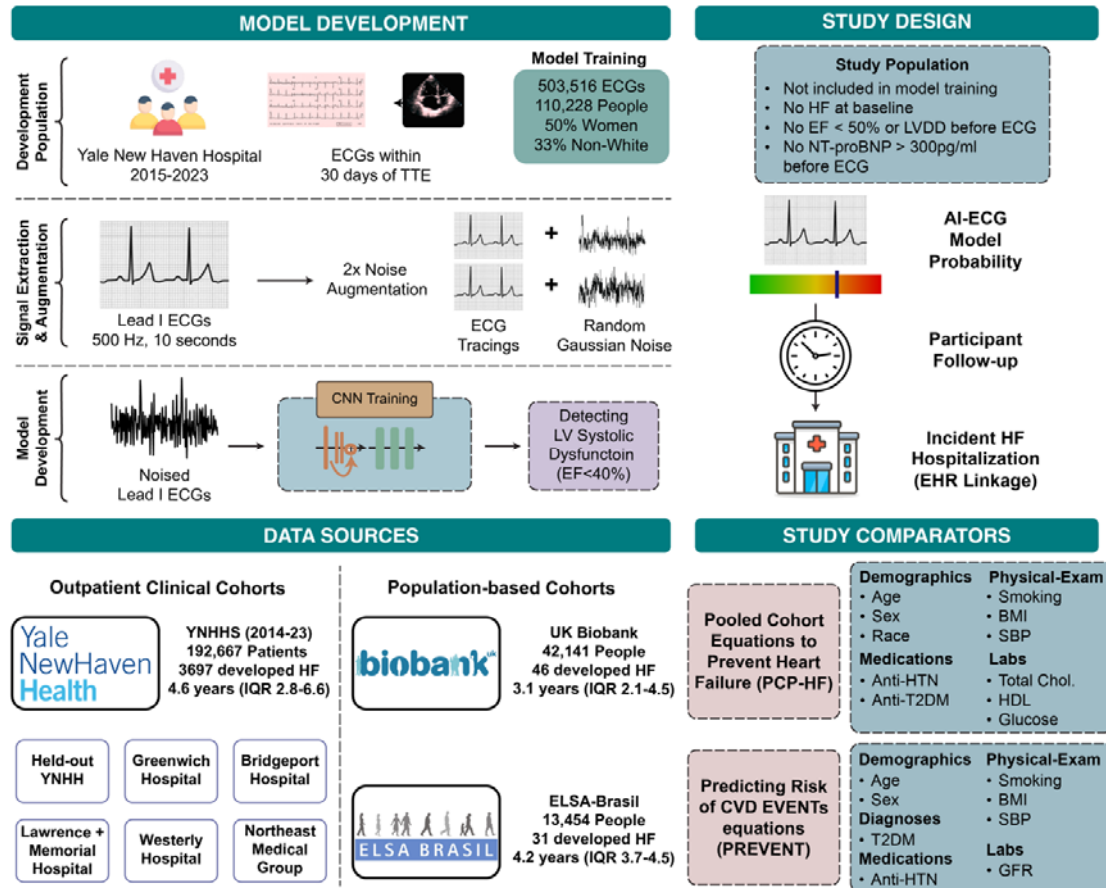

## TABLES

**Table 1. Population Characteristics of the Study Cohorts.** Abbreviations: AMI, acute myocardial infarction; ECG, Electrocardiogram; ELSA-Brasil, Brazilian Longitudinal Study of Adult Health; HF, heart failure; IQR, Interquartile Range; LVEF, Left Ventricular Ejection Fraction; UKB, UK Biobank; YNHHS, Yale New Haven Health System.

| Characteristic                                                                                    | YNHHS                    | UKB            | ELSA-Brasil    |
|---------------------------------------------------------------------------------------------------|--------------------------|----------------|----------------|
| <b>Number</b>                                                                                     | 192667                   | 42141          | 13454          |
| <b>Age at ECG, Median [IQR]</b>                                                                   | 56.1 [41.1,68.7]         | 65 [59,71]     | 51 [45,58]     |
| <b>Female Sex, N (%)</b>                                                                          | 111181 (57.7)            | 21795 (51.7)   | 7348 (54.6)    |
| <b>Race/Ethnicity, N (%)</b>                                                                      | <b>White</b>             | 117857 (61.2)  | 40691 (96.6)   |
|                                                                                                   | <b>Black</b>             | 30623 (15.9)   | 304 (0.7)      |
|                                                                                                   | <b>Hispanic</b>          | 33256 (17.3)   | 0 (0.0)        |
|                                                                                                   | <b>Asian</b>             | 3553 (1.8)     | 600 (1.4)      |
|                                                                                                   | <b>Other</b>             | 2159 (1.1)     | 546 (1.3)      |
|                                                                                                   | <b>Brazilian “Pardo”</b> | 0 (0.0)        | 0 (0.0)        |
|                                                                                                   | <b>Missing</b>           | 5219 (2.7)     | 0 (0.0)        |
| <b>Death, N (%)</b>                                                                               | 10381 (5.4)              | 346 (0.8)      | 229 (1.7)      |
| <b>Follow-up Time, Years; Median [IQR]</b>                                                        | 4.6 [2.8,6.6]            | 3.1 [2.1,4.5]  | 4.2 [3.7, 4.5] |
| <b>Positive Screens, N (%)</b>                                                                    | 42775 (22.2)             | 5513 (13.1)    | 1928 (14.3)    |
| <b>Hypertension at baseline, N (%)</b>                                                            | 88215 (45.8)             | 6126 (14.5)    | 4739 (35.3)    |
| <b>Type-2 diabetes mellitus at baseline, N (%)</b>                                                | 35522 (18.4)             | 1258 (3.0)     | 2105 (15.6)    |
| <b>Obesity at baseline, N (%)</b>                                                                 | 30493 (15.8)             | 7535 (17.9)    | 3045 (22.6)    |
| <b>Atrial fibrillation at baseline, N (%)</b>                                                     | 4746 (2.5)               | 637 (1.5)      | - <sup>a</sup> |
| <b>Left bundle branch block at baseline, N (%)</b>                                                | 2397 (1.2)               | 383 (0.9)      | - <sup>a</sup> |
| <b>Use of antihypertensive drugs at baseline, N (%)</b>                                           | 47611 (24.7)             | 9936 (23.9)    | 3640 (27.1)    |
| <b>Use of antihyperglycemic drugs at baseline, N (%)</b>                                          | 30520 (15.8)             | 321 (0.8)      | 1072 (8.0)     |
| <b>End-stage renal disease, N (%)</b>                                                             | 547 (0.3)                | 0 (0.0)        | 10 (0.1)       |
| <b>Primary HF hospitalization during follow-up, N (%)</b>                                         | 3697 (1.9)               | 46 (0.1)       | 31 (0.2)       |
| <b>Primary HF hospitalization or an echocardiogram with LVEF &lt; 50% during follow-up, N (%)</b> | 7514 (3.9)               | - <sup>b</sup> | - <sup>b</sup> |
| <b>Any HF hospitalization during follow-up, N (%)</b>                                             | 13705 (7.1)              | 231 (0.5)      | - <sup>b</sup> |
| <b>Any HF hospitalization or an echocardiogram with LVEF &lt; 50% during follow-up, N (%)</b>     | 15705 (8.2)              | - <sup>b</sup> | - <sup>b</sup> |
| <b>Primary AMI hospitalization during follow-up, N (%)</b>                                        | 366 (0.2)                | 208 (0.5)      | 60 (0.4)       |
| <b>Primary Stroke hospitalization during follow-up, N (%)</b>                                     | 3281 (1.7)               | 210 (0.5)      | 59 (0.4)       |
| <b>Major Adverse Cardiovascular Events during follow-up, N (%)</b>                                | 16039 (8.3)              | 768 (1.8)      | 338 (2.5)      |

<sup>a</sup> ECG-level information about rhythm and conduction disorders not available in the ELSA-Brasil cohort

<sup>b</sup> Follow-up echocardiogram data not available in UKB or ELSA-Brasil.

**Table 2. Model Performance for Predicting Heart Failure Risk Based on AI-ECG Probability.** Abbreviations: ELSA-Brasil, Brazilian Longitudinal Study of Adult Health; IHD, Ischemic Heart Disease; HTN, hypertension; T2DM, type-2 diabetes mellitus; UKB, UK Biobank; YNHHS, Yale New Haven Health System.

| Model Type                                    | Predictive Model Inputs                                                                                | YNHHS            |                   | UKB               |                   | ELSA-Brasil        |                   |
|-----------------------------------------------|--------------------------------------------------------------------------------------------------------|------------------|-------------------|-------------------|-------------------|--------------------|-------------------|
|                                               |                                                                                                        | Positive Screen  | Per 0.1 Increment | Positive Screen   | Per 0.1 Increment | Positive Screen    | Per 0.1 Increment |
| <b>Cox Proportional Hazard Model</b>          | AI-ECG Probability                                                                                     | 5.05 (4.73-5.39) | 1.45 (1.44-1.47)  | 7.52 (4.21-13.41) | 1.55 (1.40-1.71)  | 11.11 (5.32-23.19) | 1.83 (1.64-2.05)  |
| <b>Cox Proportional Hazard Model</b>          | AI-ECG Probability + Age + Sex                                                                         | 3.31 (3.10-3.54) | 1.32 (1.30-1.34)  | 5.96 (3.32-10.68) | 1.52 (1.37-1.68)  | 8.74 (4.13-18.48)  | 1.75 (1.56-1.97)  |
| <b>Cox Proportional Hazard Model</b>          | AI-ECG Probability + Age + Sex + IHD + HTN + T2DM + Obesity                                            | 2.81 (2.63-3.01) | 1.28 (1.26-1.30)  | 5.02 (2.77-9.09)  | 1.49 (1.33-1.66)  | 7.71 (3.62-16.46)  | 1.72 (1.52-1.93)  |
| <b>Fine-Gray Subdistribution Hazard Model</b> | AI-ECG Probability + Age + Sex and accounting for competing risk of death                              | 3.22 (3.01-3.45) | 1.30 (1.29-1.32)  | 5.91 (3.33-10.50) | 1.51 (1.38-1.66)  | 8.67 (4.02-18.70)  | 1.74 (1.55-1.96)  |
| <b>Fine-Gray Subdistribution Hazard Model</b> | AI-ECG Probability + Age + Sex + IHD + HTN + T2DM + Obesity and accounting for competing risk of death | 2.73 (2.55-2.93) | 1.27 (1.25-1.28)  | 4.99 (2.81-8.87)  | 1.49 (1.36-1.63)  | 6.53 (2.91-14.67)  | 1.65 (1.46-1.87)  |



**Table 3. Comparison of Discrimination for AI-ECG Model Output Probability with Pooled Cohort Equations to Prevent Heart Failure and Predicting Risk of Cardiovascular Disease Events Equations for Predicting Incident Heart Failure.**

Abbreviations: ELSA-Brasil, Brazilian Longitudinal Study of Adult Health; PCP-HF, Pooled Cohort Equations to Prevent Heart Failure; PREVENT, Predicting Risk of Cardiovascular Disease Events; UKB, UK Biobank; YNHHS, Yale New Haven Health System.

| Clinical Risk Score | Covariates                                  | YNHHS                    |                                                                       |         | UKB                      |                                                                       |         | ELSA-Brasil              |                                                                       |         |
|---------------------|---------------------------------------------|--------------------------|-----------------------------------------------------------------------|---------|--------------------------|-----------------------------------------------------------------------|---------|--------------------------|-----------------------------------------------------------------------|---------|
|                     |                                             | Harrel's C-statistic     | Marginal difference over Harrel's C-statistic for clinical risk score | P-value | Harrel's C-statistic     | Marginal difference over Harrel's C-statistic for clinical risk score | P-value | Harrel's C-statistic     | Marginal difference over Harrel's C-statistic for clinical risk score | P-value |
| PCP-HF              | PCP-HF                                      | 0.634<br>(0.612 - 0.656) | -                                                                     | -       | 0.740<br>(0.646 - 0.834) | -                                                                     | -       | 0.821<br>(0.748 - 0.893) | -                                                                     | -       |
|                     | AI-ECG Model Output Probability             | 0.723<br>(0.701- 0.744)  | 0.089<br>(0.058 - 0.118)                                              | < 0.001 | 0.792<br>(0.696 - 0.889) | 0.052<br>(-0.083 - 0.186)                                             | 0.45    | 0.833<br>(0.720 - 0.946) | 0.012<br>(-0.144 - 0.168)                                             | 0.8     |
|                     | AI-ECG Model Output Probability + Age + Sex | 0.729<br>(0.708 - 0.749) | 0.095<br>(0.070 - 0.119)                                              | < 0.001 | 0.836<br>(0.762 - 0.909) | 0.096<br>(-0.106 - 0.202)                                             | 0.07    | 0.904<br>(0.844 - 0.964) | 0.084<br>(-0.017 - 0.185)                                             | 0.1     |
|                     | AI-ECG Model Output Probability + PCP-HF    | 0.746<br>(0.726 - 0.766) | 0.112<br>(0.089 - 0.134)                                              | < 0.001 | 0.854<br>(0.785 - 0.923) | 0.114<br>(0.027 - 0.200)                                              | 0.01    | 0.934<br>(0.903 - 0.966) | 0.114<br>(0.034 - 0.194)                                              | 0.00    |
| PREVENT             | PREVENT                                     | 0.668<br>(0.644 - 0.693) | -                                                                     | -       | 0.776<br>(0.686 - 0.884) | -                                                                     | -       | 0.840<br>(0.740 - 0.882) | -                                                                     | -       |
|                     | AI-ECG Model Output Probability             | 0.723<br>(0.701- 0.744)  | 0.055<br>(0.032 - 0.098)                                              | < 0.001 | 0.792<br>(0.696 - 0.889) | 0.016<br>(-0.126 - 0.143)                                             | 0.90    | 0.833<br>(0.720 - 0.946) | -0.007<br>(-0.163 - 0.148)                                            | 0.92    |
|                     | AI-ECG Model Output Probability + Age + Sex | 0.729<br>(0.708 - 0.749) | 0.061<br>(0.037 - 0.095)                                              | < 0.001 | 0.836<br>(0.762 - 0.909) | 0.060<br>(-0.044 - 0.152)                                             | 0.28    | 0.904<br>(0.844 - 0.964) | 0.064<br>(-0.037 - 0.166)                                             | 0.21    |
|                     | AI-ECG Model Output Probability + PREVENT   | 0.770<br>(0.749 - 0.791) | 0.101<br>(0.079 - 0.123)                                              | <0.001  | 0.856<br>(0.784 - 0.928) | 0.080<br>(0.013 - 0.147)                                              | 0.02    | 0.941<br>(0.914 - 0.969) | 0.101<br>(0.024 - 0.178)                                              | 0.009   |



**Table 4. Integrated Discrimination Improvement and Categorical and Continuous Time-to-Event Net Reclassification Index of AI-ECG Model Output Probability over Pooled Cohort Equations to Prevent Heart Failure and Predicting Risk of Cardiovascular Disease Events Equations for Heart Failure.** Abbreviations: ELSA-Brasil, Brazilian Longitudinal Study of Adult Health; IDI, Integrated Discrimination Improvement; NRI, Net Reclassification Index; PCP-HF, Pooled Cohort Equations to Prevent Heart Failure; PREVENT, Predicting Risk of Cardiovascular Disease Events; UKB, UK Biobank; YNHHS, Yale New Haven Health System.

| Metric                 | YNHHS                  |                        | UKB                     |                        | ELSA-Brasil             |                         |
|------------------------|------------------------|------------------------|-------------------------|------------------------|-------------------------|-------------------------|
|                        | PCP-HF                 | PREVENT                | PCP-HF                  | PREVENT                | PCP-HF                  | PREVENT                 |
| <b>IDI</b>             | 0.094 (0.075 to 0.114) | 0.090 (0.077 to 0.105) | 0.165 (0.069 to 0.265)  | 0.153 (0.076 to 0.243) | 0.238 (0.107 to 0.372)  | 0.192 (0.099 to 0.295)  |
| <b>Categorical NRI</b> | 0.158 (0.102 to 0.218) | 0.128 (0.092 to 0.167) | 0.291 (0.092 to 0.494)  | 0.330 (0.088 to 0.547) | 0.488 (0.188 to 0.741)  | 0.363 (0.118 to 0.592)  |
| <b>Continuous NRI</b>  | 0.199 (0.116 to 0.283) | 0.214 (0.161 to 0.275) | 0.155 (-0.211 to 0.478) | 0.366 (0.001 to 0.701) | 0.077 (-0.238 to 0.324) | 0.122 (-0.204 to 0.455) |

## MODEL DEVELOPMENT

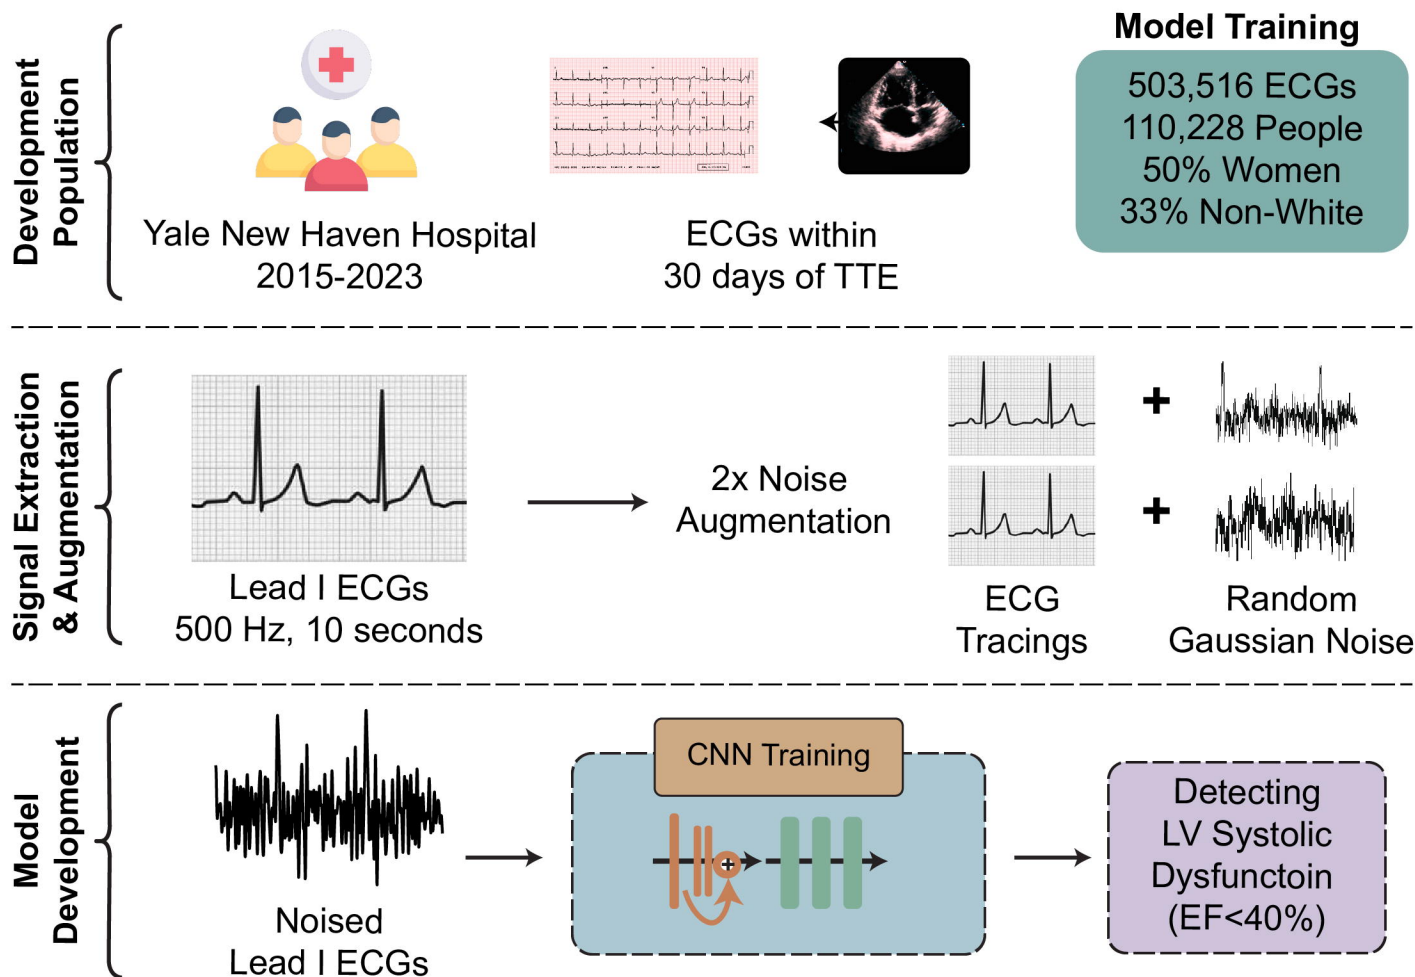

## STUDY DESIGN

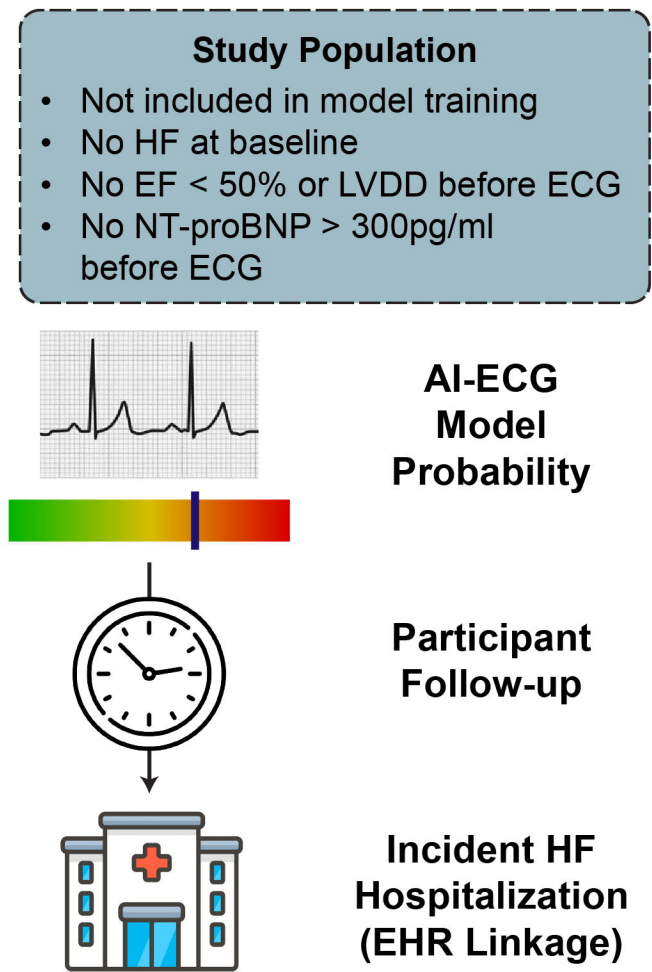

## DATA SOURCES

### Outpatient Clinical Cohorts

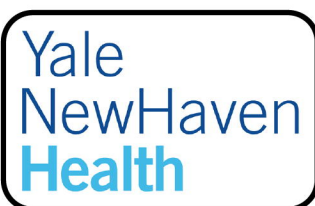

YNHHS (2014-23)  
192,667 Patients  
3697 developed HF  
4.6 years (IQR 2.8-6.6)

Held-out  
YNHH

Greenwich  
Hospital

Bridgeport  
Hospital

Lawrence +  
Memorial  
Hospital

Westerly  
Hospital

Northeast  
Medical  
Group

### Population-based Cohorts

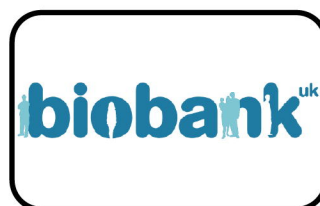

UK Biobank  
42,141 People  
46 developed HF  
3.1 years (IQR 2.1-4.5)

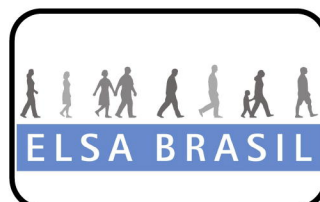

ELSA-Brasil  
13,454 People  
31 developed HF  
4.2 years (IQR 3.7-4.5)

## STUDY COMPARATORS

**Pooled Cohort Equations to Prevent Heart Failure (PCP-HF)**

**Demographics**

- Age
- Sex
- Race

**Physical-Exam**

- Smoking
- BMI
- SBP

**Medications**

- Anti-HTN
- Anti-T2DM

**Labs**

- Total Chol.
- HDL
- Glucose

**Predicting Risk of CVD EVENTS equations (PREVENT)**

**Demographics**

- Age
- Sex

**Diagnoses**

- T2DM

**Medications**

- Anti-HTN

**Physical-Exam**

- Smoking
- BMI
- SBP

**Labs**

- GFR
